# Supplementary material for: Serum levels of proteins involved in amyloid-β clearance are related to cognitive decline and neuroimaging changes in mild cognitive impairment
Source: PubMed Central journal article supplement — Alzheimers Dement (Amst). 2019 Jan 12;11:85–97. doi: 10.1016/j.dadm.2018.11.003 (PMC6335589; doi:10.1016/j.dadm.2018.11.003), 2019-01-12
Supplement: mmc1.pdf [file mmc1.pdf]

**Supplementary Materials**

## **Supplementary Methods**

### **1. Procedures of diagnosis.**

Criteria for MCI were retrospectively applied among the non-dementia individuals after the conference. Consistent with the standard criteria, for all subtypes of MCI described below, the subjects considered to have MCI were required to have (1) objective impairment in one cognitive domain based on the average of scores on neuropsychological measures within that domain, and 1 SD and 1.5 SD cutoffs derived from normative corrections for age, years of education, and sex, (2) essentially preserved activities of daily living, (3) presence of memory complaints and (4) no diagnosis of dementia by group consensus.

First, for our subtype of amnesic (a)MCI single, memory impairment was defined as a score <1 or 1.5 SD below the demographically corrected mean on the category-cued recall test; performance scores from all other cognitive domains were required to fall within normal limits (>1 or 1.5 SD below the demographically corrected mean). Second, aMCI multiple was diagnosed in the presence of memory impairment in one or more cognitive domains. Third, a diagnosis of non-amnesic (na)MCI single required cognitive impairment in a single non-memory domain and normal performance scores in all other cognitive domains. Finally, naMCI multiple was diagnosed if impairment was seen in two of the four non-memory domains and when the memory domain score was within normal limits.

### **2. MRI**

Each processed segmented image was compared to the mean and standard deviation of gray matter or white matter images of 80 healthy controls (40 males and 40 females, aged 54-86 years). The severity of atrophic changes was calculated by the z-score. The following equation was used:  $z\text{-score} = ([\text{control mean}] - [\text{individual value}]) / (\text{control standard deviation})$ . One voxel was defined as  $2\text{ mm} \times 2\text{ mm} \times 2\text{ mm}$ .

### **3. Measurement of cholesterol, glucose, and HbA1c**

Low-density lipoprotein (LDL), high-density lipoprotein (HDL), total cholesterol (TC), and triglyceride levels were measured by enzymatic methods using commercial kits (Sekisui Medical, Tokyo, Japan). Blood glucose and HbA1c were also measured by enzymatic methods using

Serotec GLU-L (Serotec, Sapporo, Japan) and CinQ HbA1c (LSI Medience Corp., Tokyo, Japan), respectively. The *APOE* genotype was determined as follows: after 40 cycle-amplification, the polymerase chain reaction product was digested with the restriction enzyme *HhaI*, and subjected to electrophoresis in a 10% polyacrylamide gel [1].

#### **4. Immunohistochemistry of complement proteins and A $\beta$ 42 in human brain specimens**

Hippocampal tissue sections were deparaffinized and rehydrated, and antigen retrieval was performed by treatment of the slides in 0.01 M citrate buffer (pH 6.0) for 10 min in the autoclave. Thereafter, the slides were cooled to  $22 \pm 2^\circ\text{C}$  and washed in phosphate buffered saline. Slides were immersed in 1% hydrogen peroxide for 45 min to block endogenous peroxidase activity. After washing and blocking, the sections were incubated at  $4^\circ\text{C}$  overnight with anti-C3 antibody, followed by a standard procedure using a Histofine MAX-PO secondary antibody (Nichirei, Tokyo, Japan) and DAB substrate kit (Nichirei). In senile plaque staining, treatment with formic acid was performed instead of autoclave treatment.

#### **5. Statistical analysis**

The area under the curve (AUC) of the receiver operating characteristic (ROC) was calculated by MedCalc (ver. 9.3.9; MedCalc Software, Mariakerke, Belgium). The closest point to the upper left corner of the ROC curve provided the optimum sensitivity and specificity values. Multivariate linear regression was used to analyze the relationship between the three sequester protein levels and the severity of cognitive decline, and can be used to model the relationship between one or more variables by fitting a linear equation. The least absolute shrinkage and selection operator (LASSO) modeling using the glmnet package (ver. 1.9-5) for R (ver. 3.1.0; R Foundation for Statistical Computing, Vienna, Austria) was used to evaluate the combination of multiple biomarkers. The results of the linear equation were further analyzed by *C*-statistics

#### **References**

[1] Wenham PR, Price WH, Blandell G. Apolipoprotein E genotyping by one-stage PCR. *Lancet* 1991;337:1158-1159.

Supplementary Table 1. Serum biomarker levels in APOE  $\epsilon$ 4- and  $\epsilon$ 4+ participants

| Characteristics                                  | APOE4 -<br>(n = 210)         | APOE4 +<br>(n = 63) | P value* |
|--------------------------------------------------|------------------------------|---------------------|----------|
| Age                                              | 69.6 $\pm$ 11.5 <sup>†</sup> | 69.6 $\pm$ 11.5     | 0.59444  |
| MMSE score                                       | 27.0 $\pm$ 4.3               | 27.4 $\pm$ 4.0      | 0.72149  |
| aC3, mg/dL                                       | 99.5 $\pm$ 17.6              | 103.0 $\pm$ 16.5    | 0.20594  |
| nC3, unit/mL                                     | 1.2 $\pm$ 0.7                | 0.2 $\pm$ 0.7       | 0.92173  |
| aC3/nC3                                          | 103.6 $\pm$ 48.7             | 105.7 $\pm$ 41.3    | 0.4171   |
| C4, mg/dL                                        | 24.6 $\pm$ 5.7               | 25.6 $\pm$ 6.1      | 0.31319  |
| TTR, mg/dL                                       | 24.3 $\pm$ 6.1               | 24.7 $\pm$ 6.5      | 0.50545  |
| ApoA-I, mg/dL                                    | 156.6 $\pm$ 28.5             | 147.1 $\pm$ 26.0    | 0.01635  |
| ApoE, mg/dL                                      | 4.1 $\pm$ 1.2                | 3.7 $\pm$ 1.0       | 0.01945  |
| HDL, mg/dL                                       | 64.0 $\pm$ 17.7              | 59.0 $\pm$ 17.0     | 0.05719  |
| LDL, mg/dL                                       | 120.1 $\pm$ 30.8             | 125.7 $\pm$ 32.9    | 0.16833  |
| TC, mg/dL                                        | 200.0 $\pm$ 33.9             | 199.4 $\pm$ 37.5    | 0.87752  |
| TG, mg/dL                                        | 155.2 $\pm$ 83.5             | 149.9 $\pm$ 92.2    | 0.42018  |
| BS, mg/dL                                        | 120.2 $\pm$ 38.1             | 116.5 $\pm$ 28.5    | 0.77508  |
| HbA1c (%)                                        | 5.7 $\pm$ 0.6                | 5.7 $\pm$ 0.5       | 0.79484  |
| Triple-marker score<br>(ApoA-I, TTR, nC3)        | 0.62 $\pm$ 0.29              | 0.71 $\pm$ 0.27     | 0.0091   |
| Triple-marker score<br>(ApoA-I, TTR,<br>aC3/nC3) | 0.67 $\pm$ 0.25              | 0.74 $\pm$ 0.21     | 0.0186   |

\*Mann-Whitney test. Significant differences among 2 groups are indicated.

<sup>†</sup>mean  $\pm$  SD

Abbreviations: aC3, active form of C3; nC3, native form of C3; TTR, transthyretin; TC, total cholesterol; TG, triglyceride; BS, blood sugar.

Supplementary Table 2. Association of serum levels of TTR, apoA-I, HDL, and TC with MMSE score

| Characteristics                               | 27-30<br>(n = 208)      | 24-26<br>(n = 26) | 20-23<br>(n = 20) | <20<br>(n = 19) | P value* |
|-----------------------------------------------|-------------------------|-------------------|-------------------|-----------------|----------|
| Age                                           | 66.2 ± 9.4 <sup>†</sup> | 72.7 ± 9.2        | 83.6 ± 5.6        | 84.2 ± 9.5      | 3.76E-16 |
| Male/Female                                   | 79 / 129                | 11 / 15           | 5 / 15            | 8 / 11          |          |
| APOE4 genotype                                | 54 (26%)                | 3 (11.5%)         | 1 (5%)            | 5 (26.3%)       |          |
| aC3, mg/dL                                    | 100.2 ± 18.1            | 98.6 ± 14.6       | 106.7 ± 14.5      | 97.4 ± 14.8     | 0.30123  |
| nC3, unit/mL                                  | 1.2 ± 0.7               | 1.2 ± 0.6         | 1.6 ± 1.0         | 1.3 ± 0.7       | 0.11524  |
| aC3/nC3                                       | 105.3 ± 44.8            | 108.1 ± 51.9      | 94.1 ± 59.3       | 95.9 ± 52.2     | 0.31808  |
| C4, mg/dL                                     | 24.8 ± 6.0              | 25.9 ± 5.5        | 22.4 ± 5.2        | 26.0 ± 4.7      | 0.10209  |
| TTR, mg/dL                                    | 25.2 ± 5.9              | 24.9 ± 5.2        | 21.6 ± 7.1        | 18.2 ± 6.3      | 5.75E-05 |
| ApoA-I, mg/dL                                 | 157.2 ± 27.5            | 154.8 ± 26.2      | 145.2 ± 28.9      | 132.6 ± 27.7    | 0.00345  |
| ApoE, mg/dL                                   | 4.0 ± 1.1               | 3.9 ± 1.0         | 4.0 ± 1.0         | 3.6 ± 0.9       | 0.39706  |
| HDL, mg/dL                                    | 65.1 ± 17.7             | 61.6 ± 15.6       | 53.8 ± 14.0       | 51.8 ± 15.9     | 0.00134  |
| LDL, mg/dL                                    | 122.9 ± 33.0            | 126.0 ± 22.1      | 120.0 ± 28.4      | 104.4 ± 23.3    | 0.05119  |
| TC, mg/dL                                     | 203.9 ± 34.8            | 204.3 ± 26.8      | 191.3 ± 31.0      | 166.9 ± 27.5    | 8.77E-05 |
| TG, mg/dL                                     | 156.8 ± 89.0            | 157.3 ± 74.5      | 160.6 ± 93.7      | 117.6 ± 46.3    | 0.37443  |
| BS, mg/dL                                     | 118.4 ± 30.8            | 115.7 ± 31.9      | 144.1 ± 78.0      | 112.6 ± 33.8    | 0.52723  |
| HbA1c (%)                                     | 5.6 ± 0.5               | 5.7 ± 0.6         | 6.0 ± 0.9         | 5.7 ± 0.8       | 0.27679  |
| Triple-marker score<br>(ApoA-I, TTR, nC3)     | 0.65 ± 0.29             | 0.67 ± 0.27       | 0.55 ± 0.31       | 0.68 ± 0.26     | 0.62755  |
| Triple-marker score<br>(ApoA-I, TTR, aC3/nC3) | 0.69 ± 0.25             | 0.71 ± 0.25       | 0.67 ± 0.21       | 0.72 ± 0.21     | 0.96442  |

\*Kruskal-Wallis test. Significant differences among 4 groups are indicated.

<sup>†</sup>mean ± SD

Abbreviations: aC3, active form of C3; nC3, native form of C3; TTR, transthyretin; TC, total cholesterol; TG, triglyceride; BS, blood sugar.

Supplementary Table 3. Correlations between serum biomarker levels and age or MMSE score

| Characteristics                           | Age           |                 | MMSE score    |                 |
|-------------------------------------------|---------------|-----------------|---------------|-----------------|
|                                           | coefficient r | <i>P</i> value* | coefficient r | <i>P</i> value* |
| aC3, mg/dL                                | 0.01519       | 0.8027          | 0.04241       | 0.48533         |
| nC3, unit/mL                              | 0.16312       | 0.00691         | -0.10817      | 0.07436         |
| aC3/nC3                                   | -0.07407      | 0.22247         | 0.06428       | 0.2899          |
| C4, mg/dL                                 | 0.07417       | 0.26686         | -0.08077      | 0.22648         |
| TTR, mg/dL                                | -0.4074       | 2.44E-12        | 0.30449       | 2.89E-07        |
| ApoA-I, mg/dL                             | -0.19377      | 0.00129         | 0.24329       | 4.86E-05        |
| ApoE, mg/dL                               | -0.0584       | 0.38223         | 0.10353       | 0.12151         |
| HDL, mg/dL                                | -0.19266      | 0.00364         | 0.26565       | 5.25E-05        |
| LDL, mg/dL                                | -0.19136      | 0.00388         | 0.14556       | 0.02869         |
| TC, mg/dL                                 | -0.29534      | 6.29E-06        | 0.29819       | 5.06E-06        |
| TG, mg/dL                                 | -0.13317      | 0.04552         | 0.10241       | 0.12476         |
| BS, mg/dL                                 | 0.13874       | 0.02584         | -0.03621      | 0.56257         |
| HbA1c (%)                                 | 0.14567       | 0.01601         | -0.09165      | 0.13089         |
| Triple-marker score<br>(ApoA-I, TTR, nC3) | -0.11306      | 0.06163         | 0.01557       | 0.79746         |
| Triple-marker score<br>(ApoA-I, TTR,      | -0.05276      | 0.38522         | -0.02758      | 0.65            |

\*Pearson test. Significant correlation between serum biomarker levels and age or MMSE score are indicated.

Abbreviations: aC3, active form of C3; nC3, native form of C3; TTR, transthyretin; TC, total cholesterol; TG, triglyceride; BS, blood sugar.

Supplementary Table 4. Serum levels of proteins involved in amyloid- $\beta$  clearance and cholesterols in participants categorized by VSRAD score in MRI

|                                                  | VSRAD 0-1<br>(n = 27)       | VSRAD 1-2<br>(n = 25)       | VSRAD >2<br>(n = 9)           | <i>P</i> value* |
|--------------------------------------------------|-----------------------------|-----------------------------|-------------------------------|-----------------|
| Age                                              | 63.2 $\pm$ 7.8 <sup>†</sup> | 68.1 $\pm$ 10.7             | 76.1 $\pm$ 7.8 <sup>†§</sup>  | 0.00374         |
| Male/Female                                      | 12 / 15                     | 9 / 16                      | 2 / 7                         |                 |
| APOE e4 carrier, %                               | 25.9                        | 28.0                        | 33.3                          |                 |
| aC3, mg/dL                                       | 98.7 $\pm$ 15.9             | 103.7 $\pm$ 15.6            | 102.8 $\pm$ 20.0              | 0.38068         |
| nC3, unit/mL                                     | 1.0 $\pm$ 0.3               | 1.1 $\pm$ 0.5               | 1.3 $\pm$ 0.5                 | 0.39886         |
| aC3/nC3                                          | 103.7 $\pm$ 32.1            | 113.6 $\pm$ 44.3            | 97.0 $\pm$ 50.5               | 0.52451         |
| C4, mg/dL                                        | 23.7 $\pm$ 4.4              | 28.5 $\pm$ 4.9 <sup>¶</sup> | 26.6 $\pm$ 6.9                | 0.01239         |
| TTR, mg/dL                                       | 24.7 $\pm$ 6.2              | 25.4 $\pm$ 5.2              | 21.7 $\pm$ 4.1                | 0.17529         |
| ApoA-I, mg/dL                                    | 164.3 $\pm$ 30.4            | 150.3 $\pm$ 21.7            | 133.9 $\pm$ 24.9 <sup>‡</sup> | 0.01801         |
| ApoE, mg/dL                                      | 3.8 $\pm$ 0.7               | 4.4 $\pm$ 0.7               | 4.4 $\pm$ 1.2                 | 0.13135         |
| HDL, mg/dL                                       | 68.3 $\pm$ 20.2             | 62.0 $\pm$ 15.1             | 53.0 $\pm$ 19.5               | 0.09237         |
| LDL, mg/dL                                       | 119.0 $\pm$ 31.8            | 134.1 $\pm$ 31.9            | 120.7 $\pm$ 24.4              | 0.45973         |
| TC, mg/dL                                        | 200.4 $\pm$ 31.5            | 210.2 $\pm$ 35.1            | 194.6 $\pm$ 27.1              | 0.80258         |
| TG, mg/dL                                        | 135.1 $\pm$ 58.1            | 147.6 $\pm$ 77.3            | 168.0 $\pm$ 114.6             | 0.9444          |
| BS, mg/dL                                        | 112.8 $\pm$ 30.5            | 124.8 $\pm$ 41.4            | 111.2 $\pm$ 17.4              | 0.42675         |
| HbA1c (%)                                        | 5.6 $\pm$ 0.4               | 5.8 $\pm$ 0.6               | 5.8 $\pm$ 0.8                 | 0.78512         |
| Triple-marker score<br>(ApoA-I, TTR, nC3)        | 0.63 $\pm$ 0.27             | 0.73 $\pm$ 0.27             | 0.74 $\pm$ 0.28               | 0.40761         |
| Triple-marker score<br>(ApoA-I, TTR,<br>aC3/nC3) | 0.63 $\pm$ 0.26             | 0.77 $\pm$ 0.27             | 0.76 $\pm$ 0.28               | 0.19772         |

\*Kruskal-Wallis test. Significant differences among 3 groups are indicated.

<sup>†</sup>mean  $\pm$  SD

<sup>‡</sup>Holm-Bonferroni test. Significant differences in VSRAD 0-1 vs. VSRAD >2 were observed in age ( $P = 4.9E-04$ ) and apoA-I ( $P = 0.00402$ ).

<sup>§</sup>Holm-Bonferroni test. Significant differences in VSRAD >2 vs. VSRAD 1-2 were observed in age ( $P = 0.02757$ ).

<sup>¶</sup>Holm-Bonferroni test. Significant differences in VSRAD 0-1 vs. VSRAD 1-2 were observed in C4 ( $P = 0.00403$ ).

Abbreviations: aC3, active form of C3; nC3, native form of C3; TTR, transthyretin; TC, total cholesterol; TG, triglyceride; BS, blood sugar.

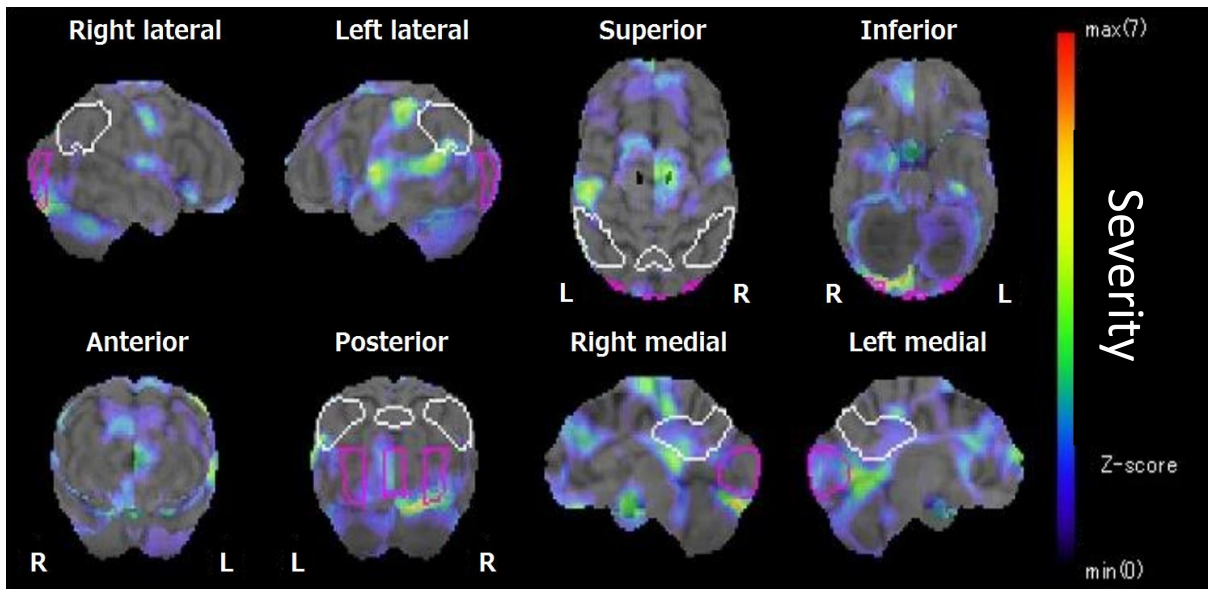

### Supplementary Figure 1. Assessment of reduction of regional cerebral blood flow

Automatic statistical analysis of brain perfusion was conducted using SPECT data. The subjects were categorized into four groups by reduction of rCBF as follows; **A**: No abnormality in four ROIs including the left/right posterior cingulate gyrus/precuneus and parietal cortex. **B**: Decreased rCBF in one ROI. **C**: Decreased rCBF in two ROIs and decreased rCBF in the posterior cingulate gyrus/precuneus. **D**: Decreased rCBF in three ROIs and decreased rCBF in the posterior cingulate gyrus and precuneus. Abbreviations: rCBF, regional cerebral blood flow; ROI, region of interest.



**aC3**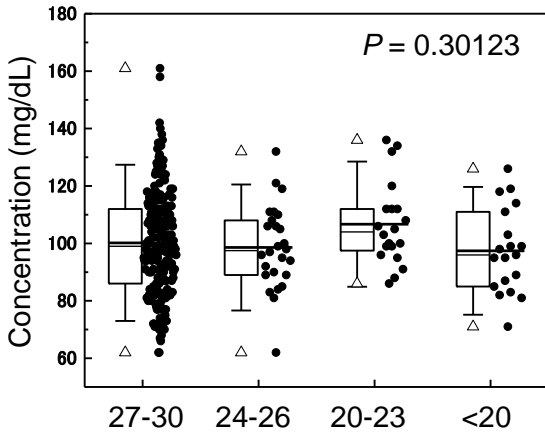**nC3**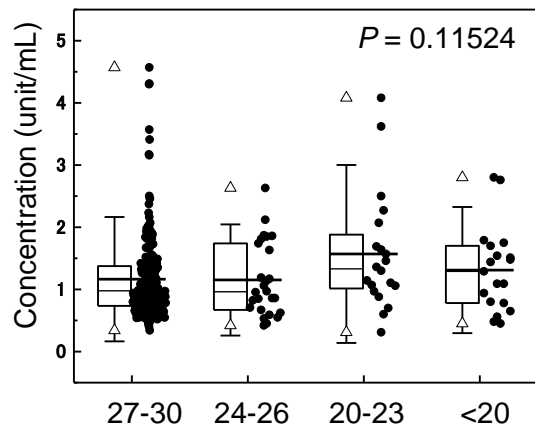**ApoA-I**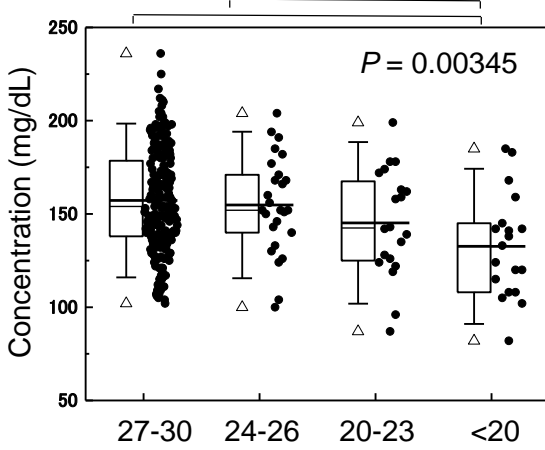**aC3/nC3**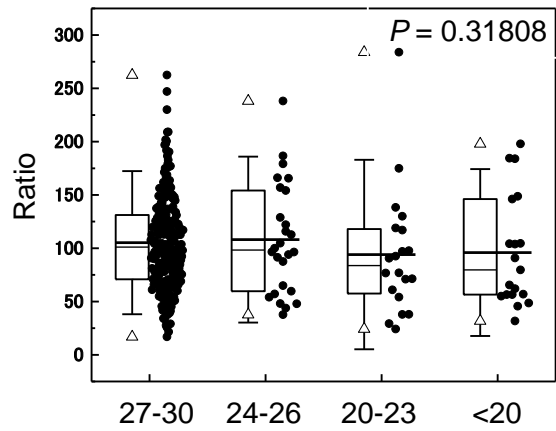**TTR**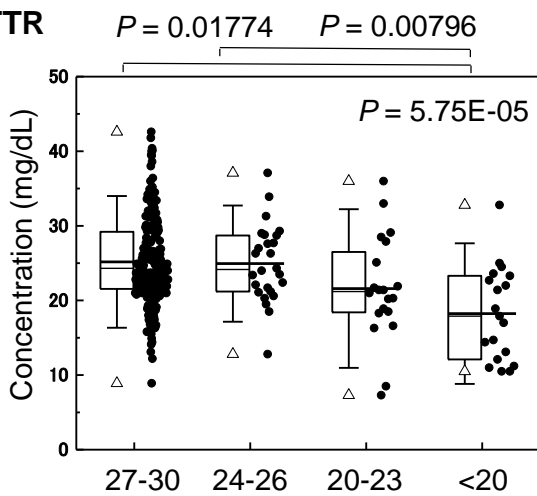**Triple-maker**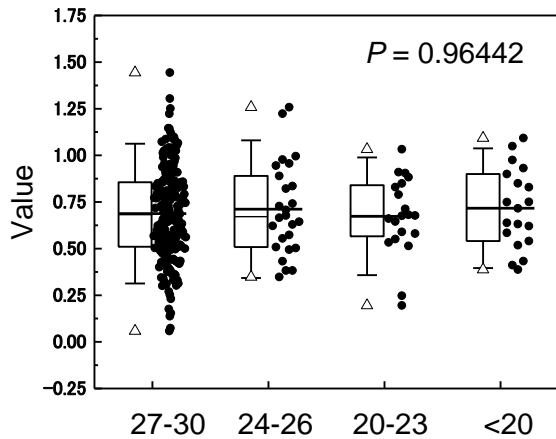**HDL**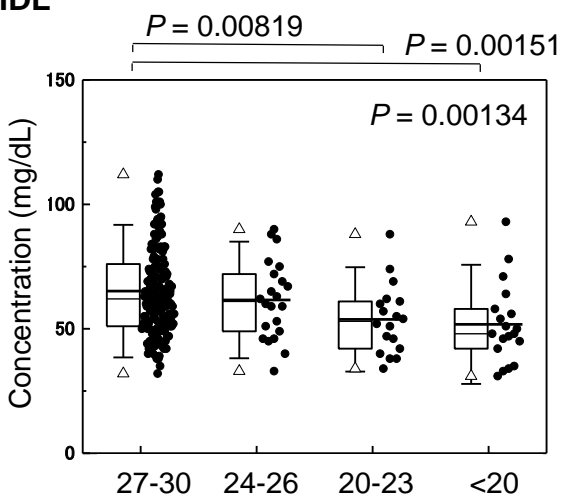**TC**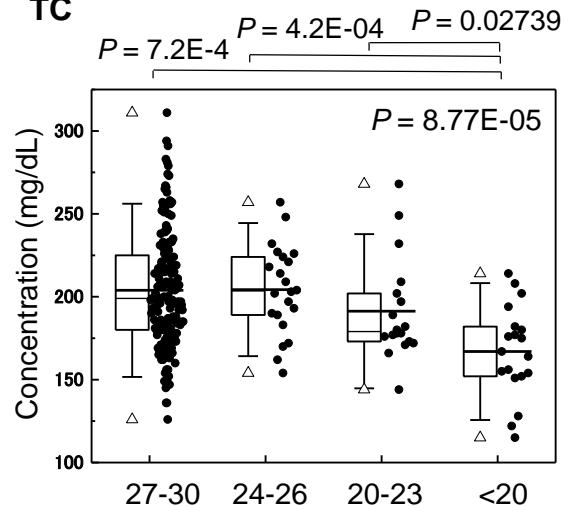

## **Supplementary Figure 2. Serum levels of the proteins involved in A $\beta$ clearance according to the MMSE scores**

Participants were grouped according to MMSE scores: 27-30 (n = 208), 24-27 (n = 26), 20-23 (n = 20), and <20 (n = 19). Open triangles indicate the highest and lowest values in each group. Error bars represent  $\pm$  1.5 standard deviation. Significant differences among the three groups are indicated (Kruskal-Wallis test). Significant differences in protein levels between two groups are also indicated (Bonferroni test).
